# Supplementary material for: Correlates of physical activity and sitting time in adults with type 2 diabetes attending primary health care in Oman
Source: Springer Nature journal article supplement (doi:10.1186/s12889-017-4643-7), 2017-08-01
Supplement: MOESM1 [file 13341926]

| (% )                                        | Work                       |                                     |          |              |           | Travel                     |                                     |         |              |              | Leisure                     |                                     |         |              |              |
|---------------------------------------------|----------------------------|-------------------------------------|----------|--------------|-----------|----------------------------|-------------------------------------|---------|--------------|--------------|-----------------------------|-------------------------------------|---------|--------------|--------------|
|                                             | Meeti<br>ng<br>14<br>(4.6) | Not<br>meeti<br>ng<br>291<br>(95.4) | O<br>R   | CI           | Sig       | Meeti<br>ng<br>29<br>(9.5) | Not<br>meeti<br>ng<br>276<br>(90.5) | O<br>R  | CI           | Sig.         | Meeti<br>ng<br>37<br>(12.1) | Not<br>meeti<br>ng<br>268<br>(87.9) | O<br>R  | CI           | Sig.         |
| Gender                                      |                            |                                     |          |              |           |                            |                                     |         |              |              |                             |                                     |         |              |              |
| Male<br>130(42.6)                           | 8<br>(6.2)                 | 122<br>(93.8)                       | 0.9<br>7 | 0.9-<br>1.0  | 0.2       | 24<br>(18.5)               | 106<br>(81.5)                       | 9.<br>2 | 3.2-<br>25.9 | <0.00<br>1** | 24<br>(18.5)                | 106<br>(81.5)                       | 3.<br>1 | 1.4-<br>6.6  | 0.005*       |
| Female 175(57.4)                            | 6<br>(3.4)                 | 169<br>(96.6)                       | Re<br>f  | ·            | ·         | 5<br>(2.9)                 | 170<br>(97.1)                       | Re<br>f | ·            | ·            | 13<br>(7.4)                 | 162<br>(92.6)                       | Re<br>f | ·            | ·            |
| Age                                         |                            |                                     |          |              |           |                            |                                     |         |              |              |                             |                                     |         |              |              |
| ≤57<br>155(50.8)                            | 9<br>(5.8)                 | 146<br>(94.2)                       | 0.9<br>7 | 0.9-<br>1.0  | 0.3       | 20<br>(12.9)               | 135<br>(87.1)                       | 3.<br>1 | 1.3-<br>7.6  | 0.01*        | 27<br>(17.4)                | 128<br>(82.6)                       | 3.<br>1 | 1.4-<br>7.1  | 0.006*       |
| >57<br>150(49.2)                            | 5<br>(3.3)                 | 145<br>(96.7)                       | Re<br>f  | ·            | ·         | 9<br>(6.0)                 | 141<br>(94.0)                       | Re<br>f | ·            | ·            | 10<br>(6.7)                 | 140<br>(93.3)                       | Re<br>f | ·            | ·            |
| Self-reported stages of<br>PA               |                            |                                     |          |              |           |                            |                                     |         |              |              |                             |                                     |         |              |              |
| Preparation/action/main<br>tenance 98(32.1) | 10<br>(10.2)               | 88<br>(89.8)                        | 4.8      | 1.4-<br>15.8 | 0.0<br>1* | 9<br>(9.2)                 | 89<br>(90.8)                        | 0.<br>9 | 0.9-<br>1.1  | 0.9          | 26<br>(26.5)                | 72<br>(73.5)                        | 5.<br>5 | 2.5-<br>12.0 | <0.00<br>1** |
| Not/getting ready<br>207(67.9)              | 4<br>(1.9)                 | 203<br>(98.1)                       | Re<br>f  | ·            | ·         | 20<br>(9.7)                | 187<br>(90.8)                       | Re<br>f | ·            | ·            | 11<br>(5.3)                 | 196<br>(94.7)                       | Re<br>f | ·            | ·            |
| Reporting barriers to<br>performing PA      |                            |                                     |          |              |           |                            |                                     |         |              |              |                             |                                     |         |              |              |
| No barriers<br>128(42.0)                    | 11<br>(8.6)                | 117<br>(98.3)                       | 4.4      | 1.2-<br>16.5 | 0.0<br>3* | 19<br>(14.8)               | 109<br>(85.2)                       | 2.<br>5 | 1.1-<br>5.8  | 0.03*        | 22<br>(17.2)                | 106<br>(91.5)                       | 0.<br>9 | 0.9-<br>1.0  | 0.8          |
| Reported barriers<br>177(58.0)              | 4<br>(1.7)                 | 173<br>(98.3<br>0                   | Re<br>f  | ·            | ·         | 10<br>(5.6)                | 167<br>(94.4)                       | Re<br>f | ·            | ·            | 15<br>(8.5)                 | 162<br>(91.5)                       | Re<br>f | ·            | ·            |
